# Supplementary material for: JAK2/STAT3 in role of arsenic-induced cell proliferation: a systematic review and meta-analysis
Source: publisher site journal article supplement (doi:10.1515/reveh-2021-0051), 2021-07-29
Supplement: Supplementary file 1 [file j_reveh-2021-0051_suppl.docx]

**JAK2/STAT3 in role of arsenic-induced cell proliferation:**

**A systematic review and meta-analysis**

**Shanshan Ran, Qingxin Ren, Shugang Li***

AUTHOR INFORMATION

Corresponding Author

Shugang Li − Department of Child, Adolescent Health and Maternal Health, School of Public Health, Capital Medical University, Beijing 100069, China; Phone: 13661170705; Email: lishugang@ccmu.edu.cn

Author

Shanshan Ran− Department of Public Health, College of Medicine, Shihezi University, Shihezi 832000, Xinjiang, China

Qingxin Ren− Department of Public Health, College of Medicine, Shihezi University, Shihezi 832000, Xinjiang, China

Abstract

Background: Malignant cell proliferation is one of the important mechanisms of arsenic poisoning. A large number of studies have shown that STAT3 plays an important role in cell malignant proliferation, but there are still many contradictions in the effect of arsenic on JAK2/STAT3.

Methods: By taking normal cells as the research object and using Standard Mean Difference (SMD) as the effect size, meta-analysis was used to explore the effect of arsenic on JAK2/STAT3. Then, the dose-effect Meta was used to further clarify the dose-effect relationship of arsenic on JAK2/STAT3.

Results: Through meta-analysis, this study found that arsenic could promote the phosphorylation of STAT3 (SMD=4.21, 95%CI [1.05,7.37]), and increase IL-6 and p-JAK2, Vimentin, VEGF expression levels, thereby inducing malignant cell proliferation. In addition, this study also found that arsenic exposure dose (<5μmol m−3), time(<24h) and cell type were important sources of heterogeneity in the process of exploring the effects of arsenic on p-STAT3, IL-6 and p-JAK2. Dose-effect relationship meta-analysis results showed that arsenic exposure significantly increased the expression level of IL-6. When the arsenic exposure concentration was less than 7μmol m−3, the expression level of p-JAK2 upregulated significantly as the arsenic exposure concentration gradually increasing. Moreover, the expression level of p-STAT3 elevated significantly with the gradual increase of the arsenic concentration under 5 μmol m−3 of arsenic exposure, but the expression level of p-STAT3 gradually decreases when the concentration is greater than 5μmol m−3.

Conclusion: Exposure to low dose of arsenic could promote the expression of JAK2/STAT3 and induce the malignant proliferation of cells through upregulating IL-6, and there was dose-effect relationship among them.

Keywords: arsenic, JAK2/STAT3, malignant proliferation, meta-analysis

1.Introduction

Arsenic is one of the carcinogens that have been identified by the International Cancer Agency. It is widely present in nature in inorganic or organic forms. Drinking arsenic-containing water is one of the main forms of arsenic exposure (1), Kuo et al (2) found that the proportion of wells with elevated arsenic levels increases by 1%, the incidence of squamous cell lung cancer increases by 0.27% per 100,000 men and 0.13% per 100,000 women per year. In addition, Epidemiological investigations have shown that arsenic exposure is related to the occurrence of bladder cancer, breast cancer, lung cancer and other diseases (3,4). Cell malignant proliferation is one of the most important processes in the occurrence and development of cancer. Previous studies have shown that arsenic exposure can participate in the regulation of cell proliferation by causing Epithelial-Mesenchymal Transition (EMT), acting on cyclins, anti-apoptotic proteins (5,6), however, the specific regulatory mechanism of arsenic on cell malignant proliferation has not been elucidated.

As an important nuclear transcription factor, Signal Transducer and Activator of Transcription 3 (STAT3) plays an important role in regulating cell proliferation, apoptosis, fibrosis and other processes (7). In recent years, a large number of studies have found that STAT3 is highly expressed in cancer cells such as kidney cancer and bladder cancer, which indicates that STAT3 is closely related to the occurrence of cancerous cells (8). Previous studies have shown that STAT3 can be regulated by inflammatory factors, Mitogen-activated protein kinase (MAPK) (9), Janus Kinase 2 (JAK2) (10). When STAT3 is phosphorylated, it can directly regulate its downstream protein, which closely related to cell proliferation including CyclinD1 and VEGF to participate in the related process of cell proliferation. Furthermore, phosphorylated STAT3 induce cell proliferation by regulating signal pathways miR-21/PTEN (11) and PI3K/Akt (12). It can be seen that, as the intersection of multiple oncogenic signal pathways, regulating cell proliferation is an important way for STAT3 to participate in regulating the occurrence and development of cancer. Notably, Li et al (5), they found that the expression of STAT3 increased significantly during the proliferation of SV-HUC-1 cells induced by arsenic, which suggested STAT3 may play an important role in the process of arsenic-induced cell proliferation.

The JAK2/STAT3 signaling pathway is a classic way for STAT3 to function, and it is of great significance in regulating cell proliferation, survival, differentiation and other processes. Zhou et al (13) found that arsenic exposure could promote the release of IL-6 and act on JAK2 to activate STAT3 to induce cell proliferation. Others (11,14,15) found that p-STAT3 expression was inhibited and arsenic induced cell proliferation was significantly reduced by using anti-IL-6, JAK2 inhibitor, and STAT3 inhibitor to intervene. The above results indicated that arsenic could promote cell proliferation through the STAT3 pathway. However, some studies have found that STAT3 plays a different role in the regulation of malignant cell proliferation by arsenic. Ya-Chun Huan et al（16）found that when the arsenic was exposed in the range of 2-8μmol m−3, the expression level of p-STAT3 remarkably increased, but it dramatically decreased (Control, 112.78±11.70 vs NaAsO2 40μmol m−3, 49.82 ± 3.97) with more than 8μmol/L arsenic exposure. However, Vladimir N et al (17) found that when the arsenic exposure concentration was 4μmol m−3 in mouse stem cells, the expression level of p-STAT3 was significantly reduced (Control, 0.925±0.012, NaAsO2, 0.512±0.009), and the apoptosis rate increased by 12% (p<0.05). More interestingly, Sun et al （9）found that arsenic exposure can significantly reduce the expression level of p-STAT3, but the cell proliferation ability was significantly improved. Thus, the role JAK2/STAT3 played in the process of arsenic-induced cell proliferation remains to be studied in depth. Therefore, this study uses meta-analysis to systematically evaluate these researches, and further explore the role of JAK2/STAT3 in arsenic-induced cell proliferation, providing a basis for perfecting the carcinogenic mechanism of arsenic.

**2. Method**

We conducted this meta-analysis according to the PRISMA guidelines

**2.1. Inclusion criteria.** Develop the inclusion criteria for this study based on the principles of PICO.

(1) Participants (P): Normal cell line, Immortalized cell; (2) Intervention (I): The experimental group intervened with arsenic compounds such as arsenic, arsenate, arsenite and arsenic trioxide. If multiple doses are used in a study, the results of the highest dose group will be selected for each index for total effect analysis;(3) Comparison (C): Normal cell lines and immortalized cells that have not been infected with arsenic compounds; (4) Outcome (O): IL-6, JAK, p-JAK, STAT3, p-STAT3 Y705, VEGF, Vimentin, E-cadherin, all results are described using the mean ± standard deviation(±SD); (5) Study Design: Experimental research.

**2.2. Exclusion criteria.** (1)Repeated publications: researches retrieved repeatedly in multiple databases; (2)Language of publication: experimental studies that are not published in Chinese or English;(3)Research type: non-experimental research such as review, literature evaluation, meta;(4)Publication format: non-journal publications such as newspapers, conference reports;(5)Result description: The content of the result description is missing, and the research that cannot fully use the mean ± standard deviation in data compilation, such as: lack of mean, lack of standard deviation, lack of control group.

**2.3. Search strategy.** We searched from the following 7 databases: PubMed, EMBASE, Web of science, CNKI, Wan Fang, Sino Med, Cochrane Library. The database retrieval time was until March 10, 2021.We mainly developed the search terms based on PICO principles. The main search terms were as follows: Arsenic, Arsenite, ATO, As2O3, NaAsO2, Arsenate, IL-6, JAK2, Janus kinase 2, proliferation, Malignant proliferation, STAT3, Signal Transducer and Activator of Transcription. Take PubMed as an example, the specific search formula is as follows: ((((((Arsenic) OR Arsenite) OR ATO) OR As2O3) OR NaAsO2) OR Arsenate) AND ((((((((("IL-6") OR JAK2) OR Janus kinase 2) OR proliferation) OR Malignant proliferation)) AND ((STAT3) OR Signal Transducer and Activator of Transcription).According to the above search formula, we retrieved a total of 306 studies (PubMed (n = 49), EMBASE (n = 74), Web of science (n = 68), CNKI (n = 49), Wan Fang (n = 60), Sino Med (n = 6), Cochrane Library (n = 0)). Screened by two people, as shown in Fig1, according to the inclusion and exclusion criteria, the reading titles and keywords found that a total of 172 studies were excluded. 134 studies were initially included for abstract reading, and a total of 99 studies met the exclusion criteria. The subsequent 35 studies were read in full text, Through the full-text reading, it was found that there were 17 studies that did not contain the results of the relevant indicators of this study. Therefore, this study included a total of 18 studies for analysis.

**2.4. Quality Evaluation.** At present, there is no classic quality evaluation tool for cell experiment meta-analysis. In this study, we formulated the quality evaluation content of this study based on the research of Golbach LA (18), CAMARADES list, STAIR list. It mainly evaluates from four aspects: Selection bias, Detection bias, Reporting bias, and Other biases. The evaluation criteria of each item are shown in supplementary Table1. The quality evaluation was completed by two people independently and then comprehensively. When the two people's conclusions are inconsistent, they will discuss according to the quality evaluation standards, and seek professional professors for another literature evaluation. After comprehensive opinions, the article quality will be evaluated.

**2.5. Statistical analysis.** Used the mean ± standard deviation to describe various indicators, and used Review Manger 5.3 to analysis the effect of arsenic on IL-6, JAK, p-JAK, STAT3, p-STAT3 Y705, VEGF, Vimentin, E-cadherin and other indicators. the Standardized Mean Difference (SMD) was used to describe the merger effect. The degree of heterogeneity was judged according to the magnitude of *I2*, if p<0.05, *I2*>50%, it means that there is heterogeneity among multiple studies. At this time, the random effects model should be selected when the combined effect analysis is performed. When the heterogeneity is high, in order to find the source of heterogeneity, subgroup analysis, meta regression analysis was performed based on different doses (dose≤5μmol m−3), different time (time≤12h), and different cell models (normal cell lines or immortalized cells), *α=0.05* was the test level for hypothesis testing. we used R 3.5.0 software to conduct a dose-effect meta-analysis, use *α=0.05* as the test level for hypothesis testing, and use *SMD* and *95% CI* for description. Finally, we used Stata SE 12.0 software for sensitivity analysis and funnel chart for publication bias detection. The Chi-square test was performed with *α*=0.05 as the test level. When *p*<0.05, the difference was considered to be statistically significant.

**2.6. Ethical approval.** The conducted research is not related to either human or animals use.

A total of 306 studies (PubMed (n = 49); EMBASE (n = 74); Web of science (n = 68); CNKI (n = 49); Wanfang (n = 60); SinoMed (n = 6), CoChrane library (n = 0))

172 studies were excluded, including:

Repeated study (n = 153); Retraction instruction (n = 3);

Retraction study (n = 3), Conferences Reporting (n = 13)

99 studies met exclusion criteria, including:

Non-experimental studies (n = 24);

Abnormal cells, including (n = 61);

Non-arsenic treatment (n = 14)

Read full text (n = 35)

Reading Abstract (n = 134)

There were no relevant indicators(n=17)

A total of 18 studies were included for analysis in this study

Fig1 Process of search

**3.Results**

3.1 Incorporate research characteristics

According to the principles of PICO, the search formula was formulated and searched in 7 databases including PubMed, Embase, and Web of Science, and a total of 309 articles were retrieved. According to the inclusion and exclusion criteria, a total of 291 studies were excluded, and 18 studies were finally included in this meta-analysis. The characteristics of the included literature were shown in Table 1.

**Table1 Characterization of the included literature**

|  | **Reference** | **n** | **Object** | Dose | **Time** | **Arsenic Type** | **Outcome**  **Index** |
| --- | --- | --- | --- | --- | --- | --- | --- |
| 1 | Zhou Qing [13] et al 2020 | 3 | SV-HUC-1 | 0.5μmol m−3 | 40w | NaAsO2 | 1,2,4,5,6 |
| 2 | Chunhua Liao [19] et al 2019 | 3 | THLE-3 cells | 4/8/16μmol m−3 | 48h | NaAsO2 | 1,2,3 |
| 3 | Xiaodong Ma [20] et al 2019 | 3 | BEAS-2B cells | 5/10μmol m−3 | 24h | NaAsO2 | 1,2,3 |
| 4 | Pengyu Ji [6] et al 2019 | 3 | 293-T cells | 5.5μg | 24h | NaAsO2 | 1,3 |
| 5 | MingtianZhong [21] et al 2018 | 3 | BEAS-2B cells | 5/10μmol m−3 | 24h | NaAsO2 | 1,2,3 |
| 6 | Qing Zhou [7] et al 2018 | 3 | SV-HUC-1 | 1/2/4/8/10μmol m−3 | 24h | NaAsO2 | 1,2,4,5,6 |
| 7 | Li Mengdan [5]et al 2017 | 3 | SV-HUC-1 | 1/2/4/8/10μmol m−3 | 24h | NaAsO2 | 1,2,4,5,6 |
| 8 | Akihiko Kimura [22] et al 2016 | 3 | mProX24 cells | 20μmol m−3 | 6h | NaAsO2 | 1,2 |
| 9 | Jiamin Mao [15] et al 2016 | 3 | HAPI microglia | 0.5/2/5/8/10/20nmol m−3 | 24h | As2O3 | 1,2 |
| 10 | Vladimir N [17] et al 2016 | 3 | mouse ESC | 2/4/6μmol m−3 | 6/16h | NaAsO2 | 1,2 |
| 11 | Fei Luo[23] et al 2015 | 3 | HBE cells | 1μmol m−3 | 3/6/12/24h | NaAsO2 | 6 |
| 12 | Xu Yuan [24] et al 2015 | 3 | HBE cells | 1μmol m−3 | 24h | NaAsO2 | 1,2 |
| 13 | Xiaolin Lu [25] et al 2015 | 3 | HaCaT cells | 1μmol m−3 | 0.25/0.5/1/3/6h | NaAsO2 | 1,2,3,6 |
| 14 | Jiaying Sun [9] et al 2014 | 3 | BEAS-2B cells | 2.5/5/10/15/20μmol m−3 | 2h | NaAsO2 | 1,2 |
| 15 | Fei Luo [26] et al2013 | 3 | HBE cells | 1μmol m−3 | 0.25/0.5/1/3/6/24h | NaAsO2 | 1,2 |
| 16 | Bailing Chen [12] et al 2013 | 3 | BEAS-2B cells | 20μmol m−3 | 2h | NaAsO2 | 1,2, |
| 17 | Akihiko Kimura [27]et al 2010 | 6 | mProX24 cells | 20μmol m−3 | 12h | NaAs | 1,2,6 |
| 18 | Ya-Chun Huang [28]et al 2007 | 3 | SV40 MES 13 | 2/4/8/10/40μmol m−3 | 48h | NaAsO2 | 1,4 |

Note. n, Represents the number of parallel samples in the experimental group; Objects, Indicates the object of arsenic intervention; Dose, Indicates the dose of arsenic intervention ;Time, Indicates the dose of arsenic intervention ; 1, STAT3, Signal Transducer and Activator of Transcription 3；2,p-STAT3, phosphorylation of STAT3；3,IL-6, Interleukin 6；4,JAK2, Janus-kinase2；5,p-JAK, phosphorylation ofJAK2；6,Outcome,including VEGF、Vimentin、E-cadherin.

3.2. Quality evaluation

According to the literature quality items, we separately evaluated the literature quality of the included 18 studies, and integrated the quality evaluation results of each study. The final combined effect is shown in Supplementary Fig1. The blind grouping in the cell experiment process is an unclear risk. The low-risk rate of the evaluation content exceeds 75%, and the high-risk rate was less than 10%.

3.3. Meta-analysis of the role of JAK2/STAT3 in arsenic-induced malignant proliferation

STAT3 is a nuclear transcription factor. When STAT3 is phosphorylated, it can participate in the regulation of cell proliferation by acting on downstream genes. According to the meta-analysis results of the effects of arsenic on STAT3 and p-STAT3 (Fig2AB), it can be found that arsenic can promote the phosphorylation of STAT3 (*SMD* = 4.21,95 %CI [1.05,7.37]).IL-6 and JAK2 are the key regulatory proteins of STAT3. Based on the meta-analysis results of the effect of arsenic on IL-6 and JAK2, it can be seen that arsenic exposure can increase the expression level of IL-6 and promote the phosphorylation of JAK2. In addition, compared with the arsenic exposure group alone, when anti-IL-6 was used to inhibit the increase in IL-6 level caused by arsenic, the increase in arsenic-induced p-STAT3 expression level was also significantly inhibited (SMD = -5.52, 95%CI [- 9.18, -1.86], which suggests that IL-6 plays an important role in the regulation of STAT3 expression by arsenic. As an important nuclear transcription factor, STAT3 can participate in the regulation of cell proliferation by acting on the downstream target proteins Vimentin, E-cadherin, VEGF and so on. As shown in Fig2F, arsenic not only can significantly increase the expression of Vimentin (*SMD* = 9.35, 95% CI (1.48, 17.23)) downstream of STAT3, and promote mesenchymal transition of epithelial cells, but arsenic can also promote the expression of VEGF.


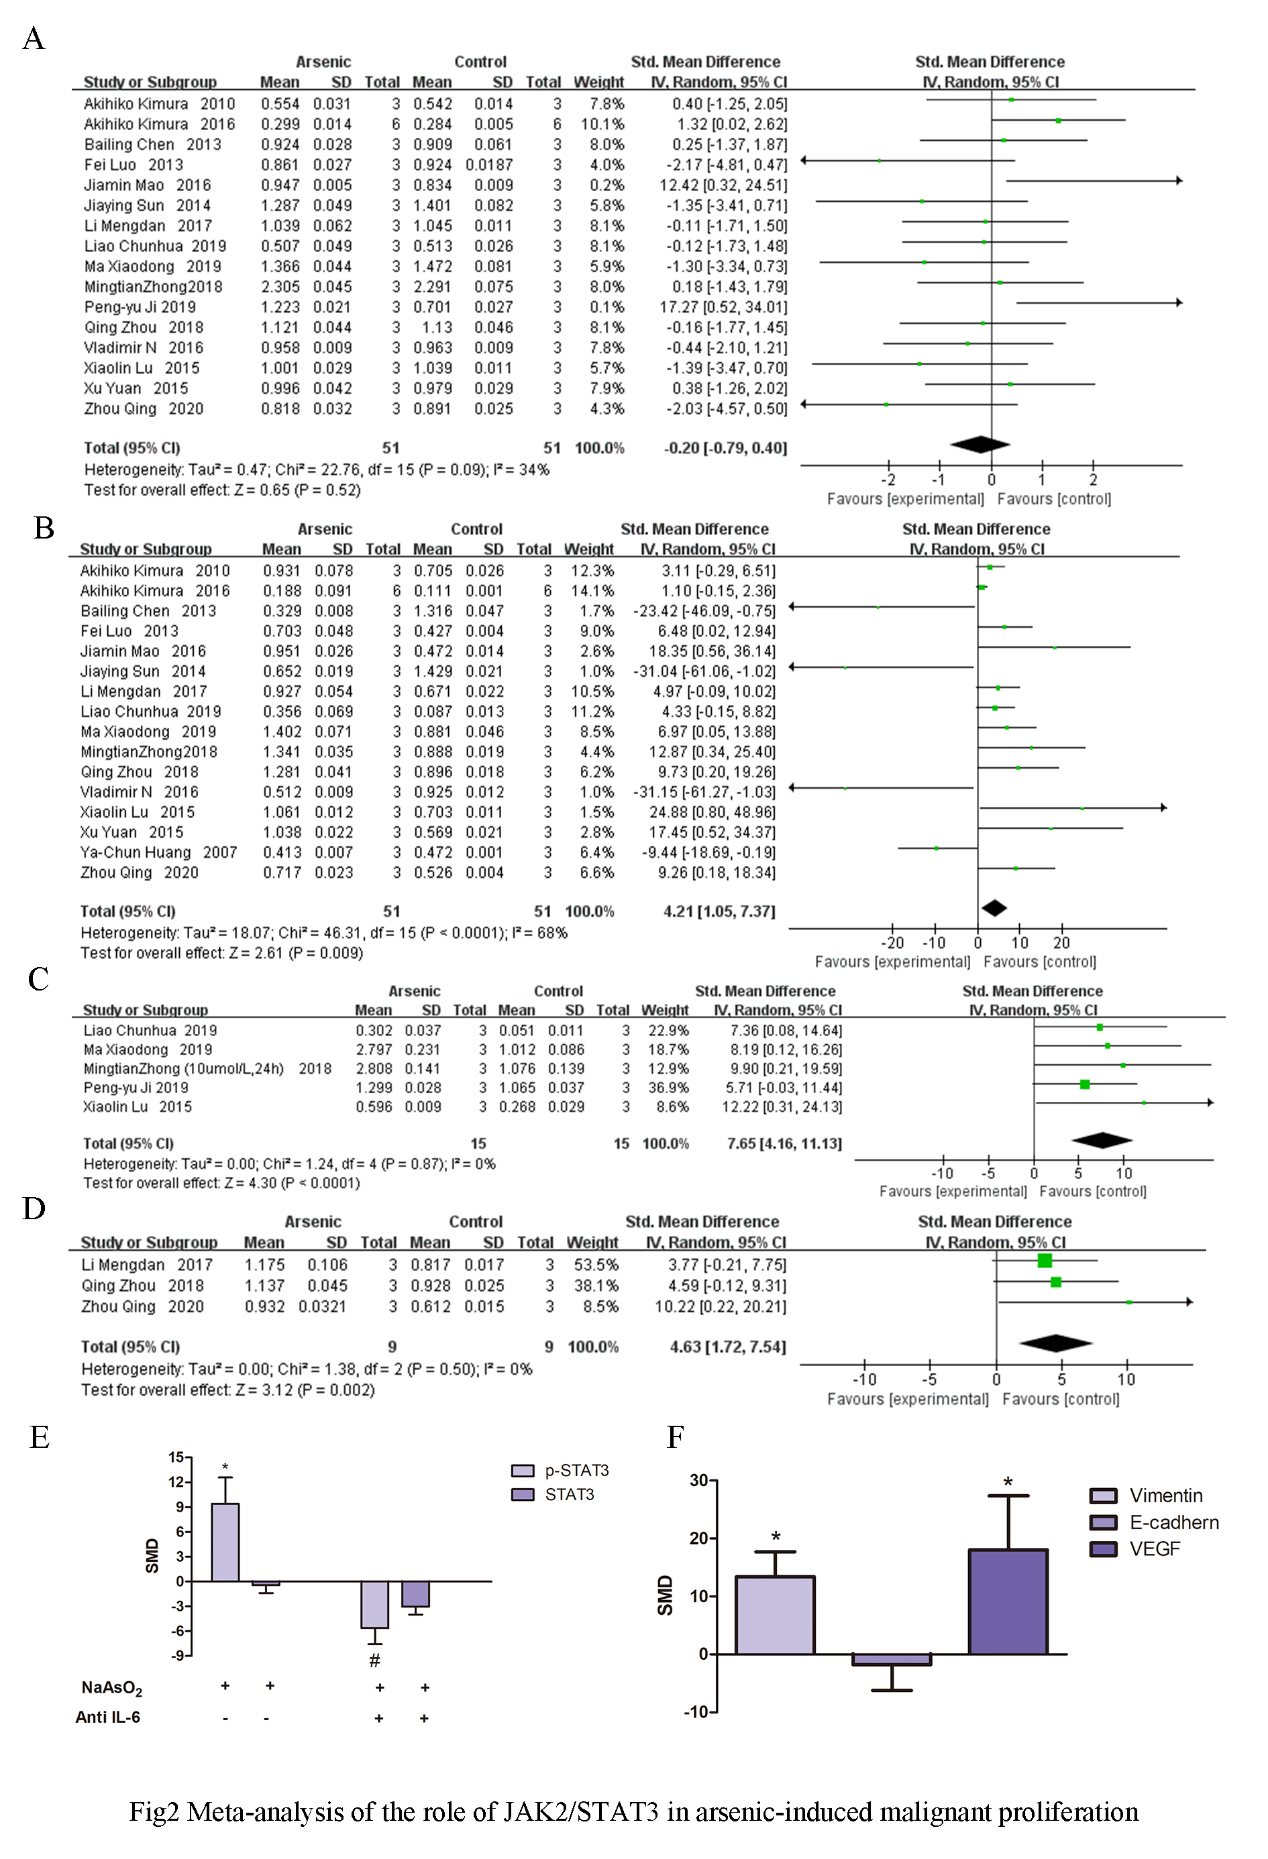


Fig2.Meta-analysis of the role of JAK2/STAT3 in arsenic-induced malignant proliferation. A: Meta-analysis of the influence of arsenic on STAT3; B: Meta-analysis of the influence of arsenic on p-STAT3; C: Meta-analysis of the effect of arsenic on IL-6; D: Meta-analysis of the influence of arsenic on p-JAK2; E: Meta-analysis of the role of IL-6 in the regulation of STAT3 by arsenic; F: Meta-analysis of the effect of arsenic on the expression of Vimentin, VEGF and E-cadherin. Forest plot shows the effect of arsenic treatment on STAT3 in experiment and control group, SMD, standardized mean difference; IV, independent variable;95%CI, 95% confidence interval; SD, standard deviation. When the P value of the overall test effect p<0.05, indicating the difference was considered statistically significant. *Compared with the blank control group, p<0.05; #Compared with NaAsO2 intervention group, p<0.05 when p<0.05, indicating the difference was considered statistically significant.

3.4. Dose-effect meta-analysis of the effect of arsenic on IL-6/STAT3 signaling pathway

In order to further explore the effect of arsenic on IL-6/STAT3 signaling pathway, a dose-effect meta-analysis was used to analyze the influence of different concentrations of arsenic on IL-6/STAT3. As shown in the Fig3, this study found that arsenic could significantly increase the expression of IL-6. When the arsenic exposure concentration was less than 7μmol m−3, the expression of p-JAK2 increased significantly, Moreover, the concentration of arsenic exposure was greater than 10μmol m−3, arsenic inhibited the expression of p-JAK2. Besides, according to the results, when the arsenic exposure concentration is less than 5μmo m−3, the expression of p-STAT3 increases significantly with the gradual increase of the arsenic concentration, but the expression of p-STAT3 was decreased by arsenic as the exposure concentration was greater than 5μmol m−3.


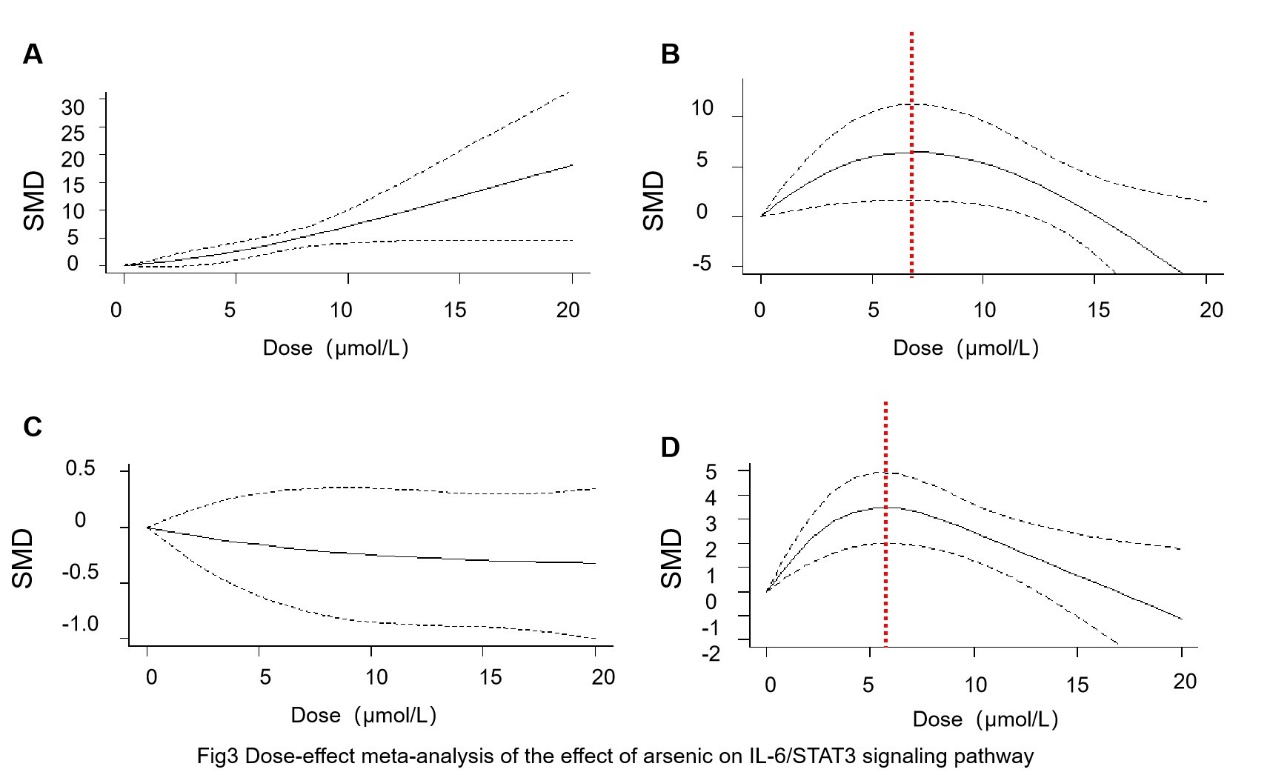


Fig3.Dose-effect meta-analysis of the effect of arsenic on IL-6/STAT3. A: Dose-effect meta-analysis of arsenic on IL-6; B: Dose-effect meta-analysis of arsenic on p-JAK2; C: Dose-effect meta-analysis of arsenic on STAT3; D: Dose-effect meta-analysis of arsenic on p-STAT3;

3.5. Subgroup analysis of the effect of arsenic on IL-6/STAT3 pathway

Studies have reported that arsenic exposure doses can cause double-sidedness of STAT3. Therefore, based on the characteristics of the included literature, we conducted a subgroup analysis of arsenic exposure doses (≤5μmol m−3), time(≤12h) and the type of cell (immortalized cells or normal cell). As shown in supplementary Fig 2, low-concentration arsenic exposure could promote IL-6 expression, increase the expression level of p-JAK, and activate STAT3 phosphorylation, which induces increased expression of VEGF. Based on the subgroup-analysis of arsenic exposure dose showed that the *I2* (p-STAT3) value decreased from 68% to 55% (*p*<0.05), which suggested that the arsenic exposure dose may be one of the heterogeneous sources. Prolonged arsenic exposure (>12h) will increase the release of inflammatory factor IL-6 and phosphorylate STAT3. The combined effect was 2.78 (0.64, 4.93), which was statistically significant. In addition, the results of cell types showed that the effect of arsenic on JAK2 is significantly different in the two cell types (p<0.05). This suggests that cell type may be one of the sources of heterogeneity in the analysis of the influence of arsenic on JAK2.

3.6. Meta-regression analysis of the effect of arsenic on IL-6/STAT3 pathway

The above subgroup analysis results suggest that arsenic exposure dose, exposure time and cell type may be the source of heterogeneity in this study. We used meta- regression to explore the influence of the above factors on arsenic on IL-6/STAT3. As shown in Table 2, the arsenic exposure dose is related to the differential expression of p-STAT3 (adjust R2=24.95%), and the differential expression of IL-6 is related to the arsenic exposure dose (adjust R2=98.17%) and the arsenic exposure time (adjust R2=78.94 %) is significantly related, and the type of research object is closely related to the differential expression of JAK2 (adjust R2=68.93%). Therefore, arsenic exposure dose, time, and type of study may be the source of heterogeneity in this study.

**Table 2 Univariate meta regression analysis of the effect of arsenic on JAK2/STAT3 signaling pathway**

|  | | Coefficient | SE | t | P value | 95%CI |
| --- | --- | --- | --- | --- | --- | --- |
| p-STAT3 | |  |  |  |  |  |
|  | Dose (reference≤5μmol m−3) |  |  |  |  |  |
|  | >5μmol m−3L | -18.901 | 8.394 | -2.250 | 0.040 | -36.904~-0.898 |
|  | Time(reference>12h) |  |  |  |  |  |
|  | ≤12h | -6.085 | 6.319 | -0.960 | 0.345 | -19.100~6.930 |
|  | Cell model (reference normal cell line) |  |  |  |  |  |
|  | Immortalized cells | 15.150 | 11.427 | 1.330 | 0.206 | -9.359~39.659 |
| STAT3 | |  |  |  |  |  |
|  | Dose (reference≤5μmol m−3) |  |  |  |  |  |
|  | >5μmol m−3 | 0.224 | 0.703 | 0.320 | 0.753 | -1.234~1.682 |
|  | Time (reference >12h) |  |  |  |  |  |
|  | ≤12h | -1.363 | 1.176 | -1.160 | 0.258 | -3.789~1.063 |
|  | Cell model (reference normal cell line) |  |  |  |  |  |
|  | immortalized cells | 0.888 | 0.982 | -0.90 | 0.381 | -2.994~1.217 |
| IL-6 | |  |  |  |  |  |
|  | Dose (reference≤5μmol m−3) |  |  |  |  |  |
|  | >5μmol m−3 | 7.325 | 2.241 | 3.270 | 0.014 | 2.028~12.622 |
|  | Time(reference>12h) |  |  |  |  |  |
|  | ≤12h | -6.671 | 2.312 | -2.880 | 0.034 | -12.615~-0.726 |
| JAK2 | |  |  |  |  |  |
|  | Dose (reference≤5μmol m−3) |  |  |  |  |  |
|  | >5μmol m−3 | -2.372 | 2.266 | -1.050 | 0.326 | -7.598 ~2.8532 |
|  | Cell model (reference normal cell line) |  |  |  |  |  |
|  | immortalized cells | -7.891 | 2.896 | -2.720 | 0.042 | -15.335~-0.447 |
| p-JAK2 | |  |  |  |  |  |
|  | Dose (reference≤5μmol m−3) |  |  |  |  |  |
|  | >5μmol m−3 | 1.762 | 2.441 | 0.720 | 0.491 | -3.867~7.390 |
| VEGF | |  |  |  |  |  |
|  | Dose (reference≤5μmol m−3) |  |  |  |  |  |
|  | >5μmol m−3 | -2.957 | 3.109 | -0.950 | 0.385 | -10.948~5.035 |

3.7. Publication bias analysis of the effect of arsenic on p-STAT3.

Stata SE 12.0 was used to analyze the publication bias of this study by Begg's and Egger's tests. as shown by supplementary Fig3 there was no publication bias in the included literature.

3.8. Sensitivity analysis of the effect of arsenic on p-STAT3

A total of 16 studies were included to explore the effect of arsenic on p-STAT3. As shown in the Fig4, if any one of the studies is removed, the predicted effect size does not exceed the 95CI% range of the overall effect size around the overall predicted effect size, which is statistically significant. The results of this study are relatively stable.

Fig4 Sensitivity analysis of the effect of arsenic on p-STAT3

**4.Discussion**

Malignant cell proliferation is one of the important stages of arsenic-induced carcinogenesis. Studies have found that STAT3 plays a role in many pathways regulating cell proliferation. In recent years, a large number of researchers have devoted themselves to explore the role of STAT3 in arsenic-induced malignant proliferation through experimental studies. In the process, Zhou et al (13) found that arsenic exposure promoted STAT3 phosphorylation, while another study (15) implied that arsenic exposure reduced STAT3 phosphorylation. It can be seen that the mechanism of the effect of arsenic on STAT3 remains to be further discussed. Therefore, this study uses meta-analysis at the cellular level to explore the role of STAT3 in arsenic-induced cell proliferation. It was found that arsenic exposure induced malignant proliferation by activating IL-6/STAT3 signaling pathway to regulate downstream proliferation-related proteins such as VEGF, Vimentin, E-cadherin and so on. In addition, there was a dose-effect relationship between arsenic IL-6 and JAK2/STAT3 pathway. These results provided a basis for further elucidating the carcinogenic mechanism of arsenic.

STAT3 exists widely in the cytoplasm and is the key downstream effector protein of cytokines and growth factors. A large number of studies have shown that STAT3 can inhibit cell apoptosis and promote cell proliferation. JAK2/STAT3 signal pathway is the classic pathway in the process of STAT3 regulating cell proliferation (28). Zhou et al (13) and Li et al (5) showed that arsenic exposure could regulate cell proliferation by up-regulating p-STAT3. In this study, we found that arsenic exposure could significantly increase the expression of p-STAT3 by promoting JAK2 phosphorylation, thereby regulating VEGF and Vimentin, E-cadherin to cause malignant cell proliferation. MicroRNAs are a class of small non-coding RNAs that can participate in the regulation of cell physiological and pathological processes through single or combined forms (29). Recently, a lot of studies have shown that STAT3 can specifically regulate the expression of miR-21, miR301a. Xu et al (11) found that arsenic exposure can increase the expression of STAT3 in HBE cells, promote the transfer of miR-21 into adjacent HBE cells through exosomes, and lead to cell proliferation. In addition, Sun et al (9) and Huang et al (10) also found that arsenic exposure can act on PI3K/Akt and the anti-apoptotic protein Bcl-6 to promote malignant cell proliferation through STAT3. This shows that STAT3 plays an important role in the malignant proliferation of arsenic-induced cells. IL-6 is a pleiotropic inflammatory factor. Many studies have shown that arsenic exposure can regulate the release of IL-6 from cells, thereby participating in the induction of cell inflammatory damage, cell proliferation and other biological processes (24). Kimura, A et al (26) used IL-6 knockout mice and mProx24 cells for arsenic exposure and found that IL-6 can promote the expression of JAK2/STAT3, thereby inhibiting the activation of ERK and inhibiting the occurrence of ACD. In this study, we also found that arsenic exposure can activate the JAK2/STAT3 pathway by promoting the expression of IL-6. When anti-IL-6 is used to inhibit IL-6 expression, the ability of arsenic to induce JAK2/STAT3 activation is significantly inhibited. IL-6 is an important target of NF-κB involved in regulating tumor growth and invasion (30). Studies have found that when arsenic exposure inhibits the expression of NF-κB p65 and p50 in HCC cells, the expression level of STAT3 is also significantly inhibited (31). In addition, a large number of studies have found that Suppressor of cytokine signaling (SOCS) proteins are induced by cytokines and play a negative feedback regulatory role in a variety of cytokine-mediated pathways (32). Studies have shown that IL-6 and other inflammatory factors can induce the production of SOCS (33). SOCS1 can bind to JAK2 to inhibit the phosphorylation of STAT3 (34,35). However, studies have also found that when JAK2/STAT3 was activated, SOCS1 was reduced, and cell viability significantly increased (36). Interestingly, it has been discovered that SOCS is also stimulated by a variety of environmental compounds. Arsenic exposure in U266 cells can inhibit SOCS1 methylation, promote SOCS1mRNA and protein expression, and inhibit cancer cell ability (37). Therefore, NF-κB and SOCS1 may be the target factors for arsenic to regulate STAT3 through inflammatory factors. Moreover, JNK is a member of the MAPK family Some study showed that when the expression of JNK is inhibited, p-STAT3 is significantly inhibited. Mao et al (15) found that arsenic could increase the expression of JNK and then promote the expression of p-STAT3, thereby regulating the expression of its downstream target genes miR-21, Spry2, and Akt to regulate cell proliferation. This suggests that JNK may play an important role in the regulation of cell proliferation by arsenic through JAK2/STAT3 (12). However, the dose-effect analysis found that low-dose arsenic exposure could promote the expression of IL-6 and activate JAK2/STAT3 pathway, but high-dose arsenic could promote the release of IL-6 and inhibit the expression of JAK2/STAT3, suggesting that there may be many ways for arsenic to regulate JAK2/STAT3. One such molecule is SHP-1, which can inhibit tyrosine kinases by dephosphorylation. In the process of arsenic treatment of gastric cancer, high-dose arsenic exposure can dephosphorylate STAT3 by activating SHP-1 thereby inactivating JAK2/STAT3(38). Moreover, Wei-Chun Hu et al (39) also found that the combination of As/CDPP can inhibit the expression of STAT3 by activating AMPK and participate in the regulation of autophagy. Therefore, these studies suggest that NF-κB, SHP-1, JNK and AMPK may play an important role in the activation of JAK2/STAT3 induced by arsenic (Fig5).

The subgroup analysis and Meta-regression, showed that arsenic exposure dose was the main source of heterogeneity in exploring the effects of arsenic on IL-6, JAK2 and STAT3. The meta-analysis of dose-response relationship, showed that when the arsenic exposure dose was less than 5μmol m−3, the expression level of IL-6 and JAK2/STAT3 increased significantly with the increase of dose, but when the exposure dose of arsenic was more than 5μmol m−3, the expression level of JAK2/STAT3 decreased significantly with the increase of dose. Sensitivity analysis and publication bias showed that the results of this study were stable. However, according to the literature quality evaluation, during the cell experiment, blind grouping is not clear risk, which still need to be further improved.

In summary, from the cell level, this study that low-dose arsenic could promote JAK2/STAT3 expression and induce cell proliferation through IL-6, There is a dose-effect relationship among them, but high-dose arsenic exposure will inhibit JAK2/STAT3 expression. However, the mechanism of the effect of high-dose arsenic on JAK2/STAT3 still needs to be further studied. In addition, this study has not explored the role of JAK2/STAT3 in arsenic poisoning through in vivo and population epidemiological investigations. STAT3 is the intersection of multiple signal pathways, and SOCS1 and JNK play an important role in the regulation of JAK2/STAT3. Studies have also shown that SOCS1 and JNK may be affected during high arsenic exposure. Therefore, we will study the effects of arsenic on SOCS1 and JNK and the role of SOCS1 and JNK in arsenic regulation of JAK2/STAT3 should be further study to improve the mechanism of arsenic inducing malignant cell proliferation through JAK2/STAT3.


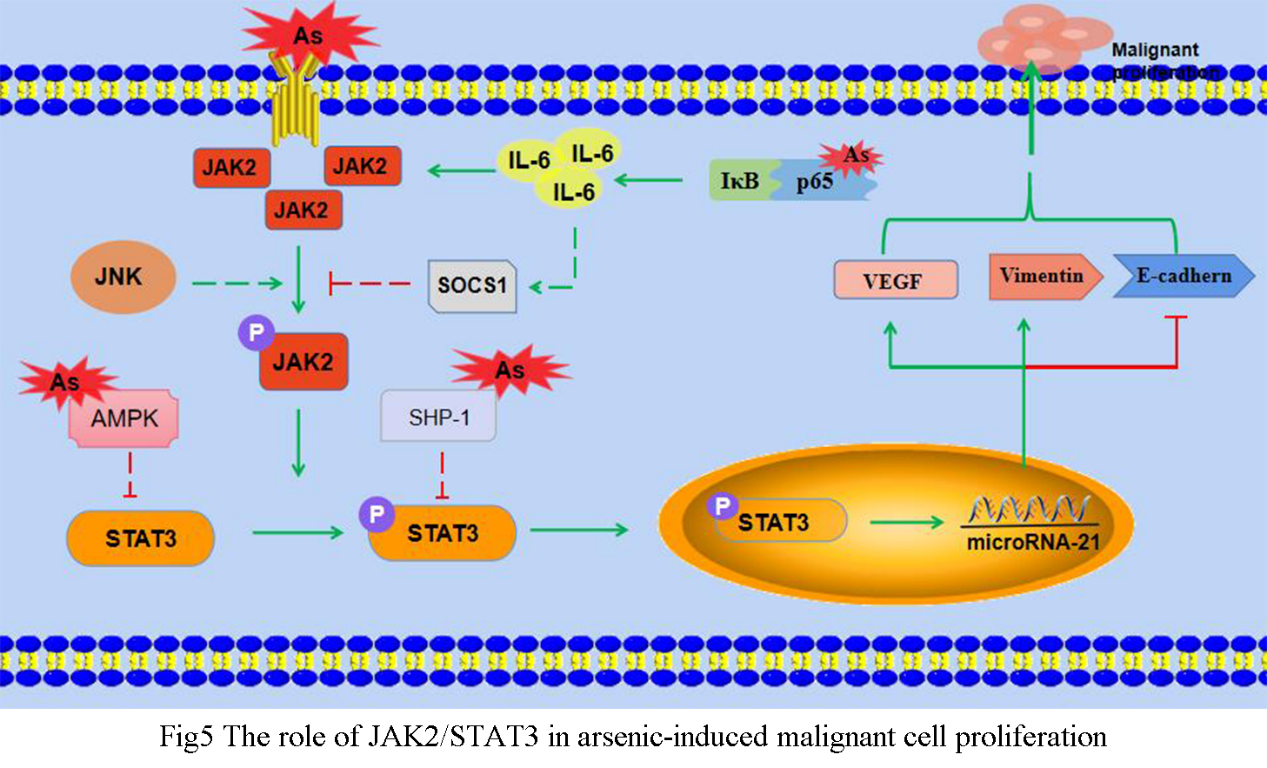


**Acknowledgments:** This study would like to thank Professor Shugang Li for his guidance, thank research team for their selfless help and I would like to thank Professor Azeem for his help in writing.

**Research funding:** This work was supported by grants from the National Natural Science Foundation of China (81760584).

**Author contributions:** All authors have accepted responsibility for the entire content of this manuscript and approved its submission.

**Competing interests:** Authors state no conflict of interest.

**Informed consent:** Informed consent was obtained from all individual including in this study.

**Ethical approval:** The conducted research is not related to either human or animal use.

**ABBREVIATIONS**

CNKI, China National Knowledge Infrastructure; EMT, Epithelial-Mesenchymal Transition; EMBASE, Excerpta Medica Database; IL-6, Interleukin 6; JAK2, Janus-kinase2; MAPK, Mitogen-activated protein kinase; miR-21, microRNA 21; miR-301a; microRNA 301a; SMD, standard mean difference; STAT3, Signal Transducer and Activator of Transcription 3; SOCS1, Suppressor of cytokine signaling1; VEGF, vascular endothelial growth factor;

References

1. Nurchi V M, Djordjevic AB, Crisponi G. Arsenic Toxicity: Molecular Targets and Therapeutic Agents[J]. Biomolecules, 2020, 10(2):235.
2. Kuo YC, Lo YS, Guo HR, 2017. Lung Cancer Associated with Arsenic Ingestion: Cell-type 558 Specificity and Dose Response. Epidemiology. 28 (S1), S106-S112.
3. Minatel BC, Sage AP, Anderson C, et al. 2018. Environmental arsenic exposure: from genetic susceptibility to pathogenesis. Environ. Int. 112, 183e197.
4. Jiang F, Li Y, Si L, et al. Interaction of EZH2 and P65 is involved in the arsenic trioxide-induced anti-angiogenesis in human triple-negative breast cancer cells[J]. Cell Biology and Toxicology, 2019.
5. Mengdan L, Chen W, Li JY, et al. Low concentration arsenite activated JAK2/STAT3 signal and increased proliferative factor expressions in SV-HUC-1cells after short and longtime treatment[J]. Environmental Toxicology, 2017.
6. Ji PY, Li ZY, Wang H et al. Arsenic and sulfur dioxide co-exposure induce renal injury via activation of the NF-κB and caspase signaling pathway. [J]. Chemosphere, 2019.
7. Zhou Q, Jin P, Liu J. HER2 and Src co-regulate proliferation, migration and transformation by downstream signaling pathways in arsenite-treated human uroepithelial cells. [J]. Metallomics: integrated biometal science, 2018.
8. Fathi N, Rashdi G, Sharifi S. STAT3 and apoptosis challenges in cancer[J]. International Journal of Biological Macromolecules, 2018: S0141813018304604.
9. Sun J, Yu M, Lu Y, et al. Carcinogenic metalloid arsenic induces expression of mdig oncogene through JNK and STAT3 activation[J]. Cancer Letters, 2014, 346(2):257-263.
10. Huang YC, Hung WC, Kang WY, et al. Expression of STAT3 and Bcl-6 oncoprotein in sodium arsenite-treated SV-40 immortalized human uroepithelial cells. [J]. Toxicology Letters, 2007, 173(1):57-65.
11. Xu Y, Luo F, Liu Yi et al. Exosomal miR-21 derived from arsenite-transformed human bronchial epithelial cells promotes cell proliferation associated with arsenite carcinogenesis. [J]. Arch Toxicol, 2015, 89: 1071-82.
12. Chen B, Liu J, Chang Q, et al. JNK and STAT3 signaling pathways converge on Akt-mediated phosphorylation of EZH2 in bronchial epithelial cells induced by arsenic[J]. Cell cycle (Georgetown, Tex.), 2012, 12(1):112-121.
13. Zhou Q, Jin P, Liu J, et al. Arsenic-induced HER2 promotes proliferation, migration and angiogenesis of bladder epithelial cells via activation of multiple signaling pathways in vitro and in vivo[J]. Science of The Total Environment, 2020, 753:141962.
14. Shen L, Ling M, Li Y, et al. Feedback Regulations of miR-21 and MAPKs via Pdcd4 and Spry1 Are Involved in Arsenite-Induced Cell Malignant Transformation[J]. PLoS ONE, 2013, 8(3): e57652.
15. Mao, Jiamin, Yang,etal. Arsenic trioxide mediates HAPI microglia inflammatory response and subsequent neuron apoptosis through p38/JNK MAPK/STAT3 pathway. [J]. Toxicology & Applied Pharmacology, 2016, 303:79-89.
16. Huang YC, Hung WC, Kang WY, et al. Expression of STAT3 and Bcl-6 oncoprotein in sodium arsenite-treated SV-40 immortalized human uroepithelial cells. [J]. Toxicology Letters, 2007, 173(1):57-65.
17. Ivanov VN, Wen G, Hei T K. Sodium arsenite exposure inhibits AKT and Stat3 activation, suppresses self-renewal and induces apoptotic death of embryonic stem cells. [J]. Apoptosis, 2012, 18(2).
18. Golbach LA, Portelli LA, Savelkoul HF, et al. Calcium homeostasis and low-frequency magnetic and electric field exposure: A systematic review and meta-analysis of in vitro studies[J]. Environment International, 2016, 92-93(Jul.-Aug.):695-706.
19. Liao CH, Bian HF, Fang DK et al. Relationship between DNA damage and IL-6/p-STAT3 expression in human THLE-3 cells induced by arsenic compounds [J]. Journal of Toxicology, 2019,033 (003): 205-208. (China)
20. Zhong MT. Study on the mechanism of anti-small cell lung cancer and arsenic trioxide-induced malignant transformation of BEAS-2B cells by sanguinarine chloride [D]. 2019.(China)
21. Zhong MT, Huang ZJ, Wang L, et al. Malignant Transformation of Human Bronchial Epithelial Cells Induced by Arsenic through STAT3/miR-301a/SMAD4 Loop. [J]. Sci Rep, 2018, 8: 13291.
22. Kimura A, Ishida YK, Nosaka M, et al. Exaggerated arsenic nephrotoxicity in female mice through estrogen-dependent impairments in the autophagic flux. [J]. Toxicology, 2016, 339: 9-18.
23. Luo F, Ji J, Liu Y, et al. MicroRNA-21, up-regulated by arsenite, directs the epithelial-mesenchymal transition and enhances the invasive potential of transformed human bronchial epithelial cells by targeting PDCD4. [J].Toxicol Lett, 2015, 232: 301-9.
24. Lu XL, Luo F, Liu Yi, et al. The IL-6/STAT3 pathway via miR-21 is involved in the neoplastic and metastatic properties of arsenite-transformed human keratinocytes. [J]. Toxicol Lett, 2015, 237: 191-9.
25. Luo F, Xu Y, Ling M, et al. Arsenite evokes IL-6 secretion, autocrine regulation of STAT3 signaling, and miR-21 expression, processes involved in the EMT and malignant transformation of human bronchial epithelial cells. [J].Toxicol Appl Pharmacol, 2013, 273: 27-34.
26. Kimura A, Ishida Y, Wada Takashi, et al. The absence of interleukin-6 enhanced arsenite-induced renal injury by promoting autophagy of tubular epithelial cells with aberrant extracellular signal-regulated kinase activation. [J]. Am J Pathol, 2010, 176: 40-50.
27. Huang YC, Hung WC, Kang WY, et al. Expression of STAT3 and Bcl-6 oncoprotein in sodium arsenite-treated SV-40 immortalized human uroepithelial cells. [J] .Toxicol Lett, 2007, 173: 57-65.
28. Liu Y, Liao S, Bennett Samuel et al. STAT3 and its targeting inhibitors in osteosarcoma. [J]. Cell Prolif, 2021, 54: e12974.
29. Tabaei S, Tabaee SS, Implications for MicroRNA involvement in the prognosis and treatment of atherosclerosis. [J]. Mol Cell Biochem, 2021, undefined: undefined.
30. Loh CY, Arya A, Naema A F et al. Signal Transducer and Activator of Transcription (STATs) Proteins in Cancer and Inflammation: Functions and Therapeutic Implication. [J] .Front Oncol, 2019, 9: 48.
31. Zhang X, Hu B, Sun YF et al. Arsenic trioxide induces differentiation of cancer stem cells in hepatocellular carcinoma through inhibition of LIF/JAK1/STAT3 and NF-kB signaling pathways synergistically. [J]. Clin Transl Med, 2021, 11: e335.
32. Santos M, Rates G, Queiroz JC et al. Suppressors of cytokine signaling (SOCS) proteins in inflammatory bone disorders. [J]. Bone, 2020, 140: 115538.
33. Khan MG, Musawwir GA, Variya B, et al. Hepatocyte growth control by SOCS1 and SOCS3. [J]. Cytokine, 2019, 121: 154733.
34. Park JM, An JM, Han YM, et al. Helicobacter pylori Walnut polyphenol extracts inhibit -induced STAT3 phosphorylation through activation of PPAR-γ and SOCS1 induction. [J]. J Clin Biochem Nutr, 2020, 67: 248-256.
35. Arora L, Kumar AP, Frank A et al. The Role of Signal Transducer and Activator of Transcription 3 (STAT3) and Its Targeted Inhibition in Hematological Malignancies. [J]. Cancers (Basel), 2018, 10: undefined.
36. Zhu ML, Wang HY, Chen JW, et al. Sinomenine improve diabetic nephropathy by inhibiting fibrosis and regulating the JAK2/STAT3/SOCS1 pathway in streptozotocin-induced diabetic rats. [J]. Life Sci, 2021, 265: 118855.
37. Kim S H, Soon YH, Kyung JM, et al. Arsenic trioxide attenuates STAT-3 activity and epithelial-mesenchymal transition through induction of SHP-1 in gastric cancer cells. [J]. BMC Cancer, 2018, 18: 150.
38. Hu WC, Teo WH, Huang TF et al. Combinatorial Low Dose Arsenic Trioxide and Cisplatin Exacerbates Autophagy via AMPK/STAT3 Signaling on Targeting Head and Neck Cancer Initiating Cells. [J]. Front Oncol, 2020, 10: 463.
39. Wu D, Dong W, Fang K, et al. As Exhibits Good Killing Effect on Multiple Myeloma Cells Via Repressing SOCS1 Methylation-Mediated JAK2/STAT3 Signaling Pathway. [J]. Technol Cancer Res Treat, 2019, 18: 1533033819896806.
